# Supplementary material for: Interaction between PD-L1 and soluble VEGFR1 in glioblastoma-educated macrophages
Source: Springer Nature journal article supplement (doi:10.1186/s12885-023-10733-5), 2023-03-20
Supplement: MOESM1 [file 24646430]

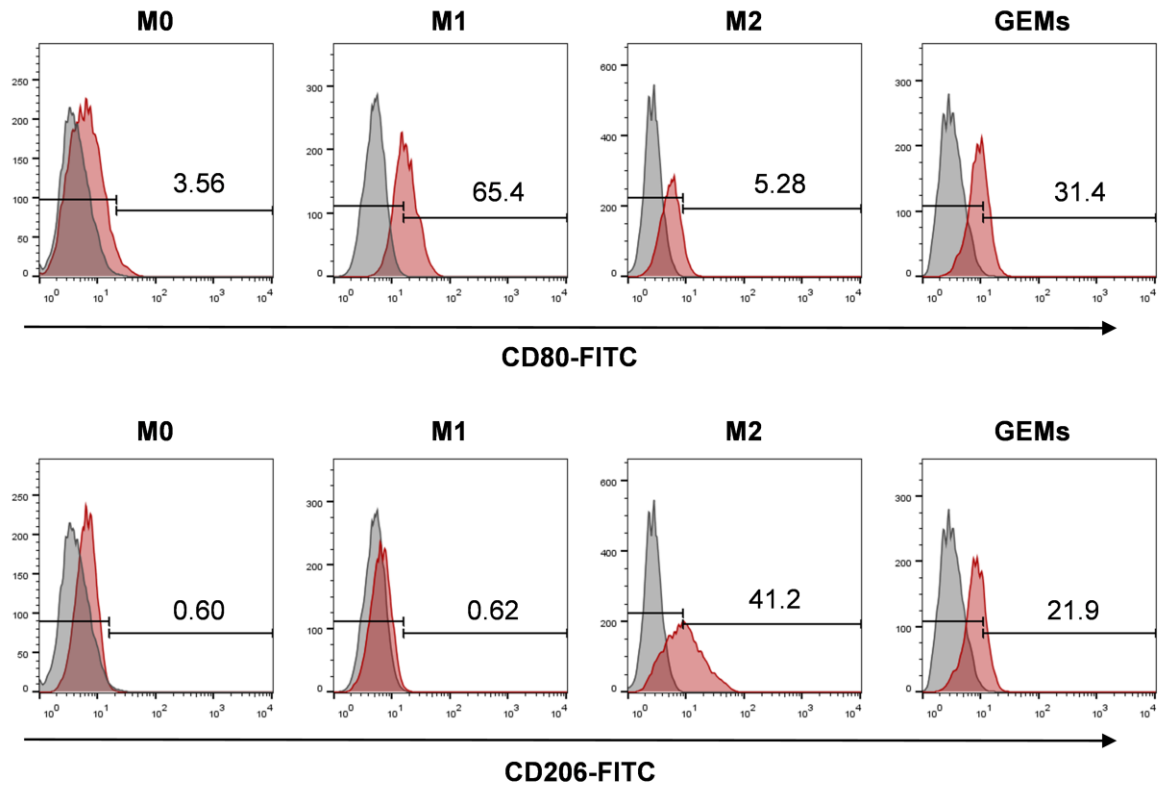

**Supplemental Figure 1. The characteristics of monocyte-derived macrophages or GBM-educated macrophages.** Typical flow-cytometry results of CD80 (upper) and CD206 (lower) surface expression on monocyte-derived M0, M1, M2 cells in vitro, or GBM-educated macrophages (GEMs).

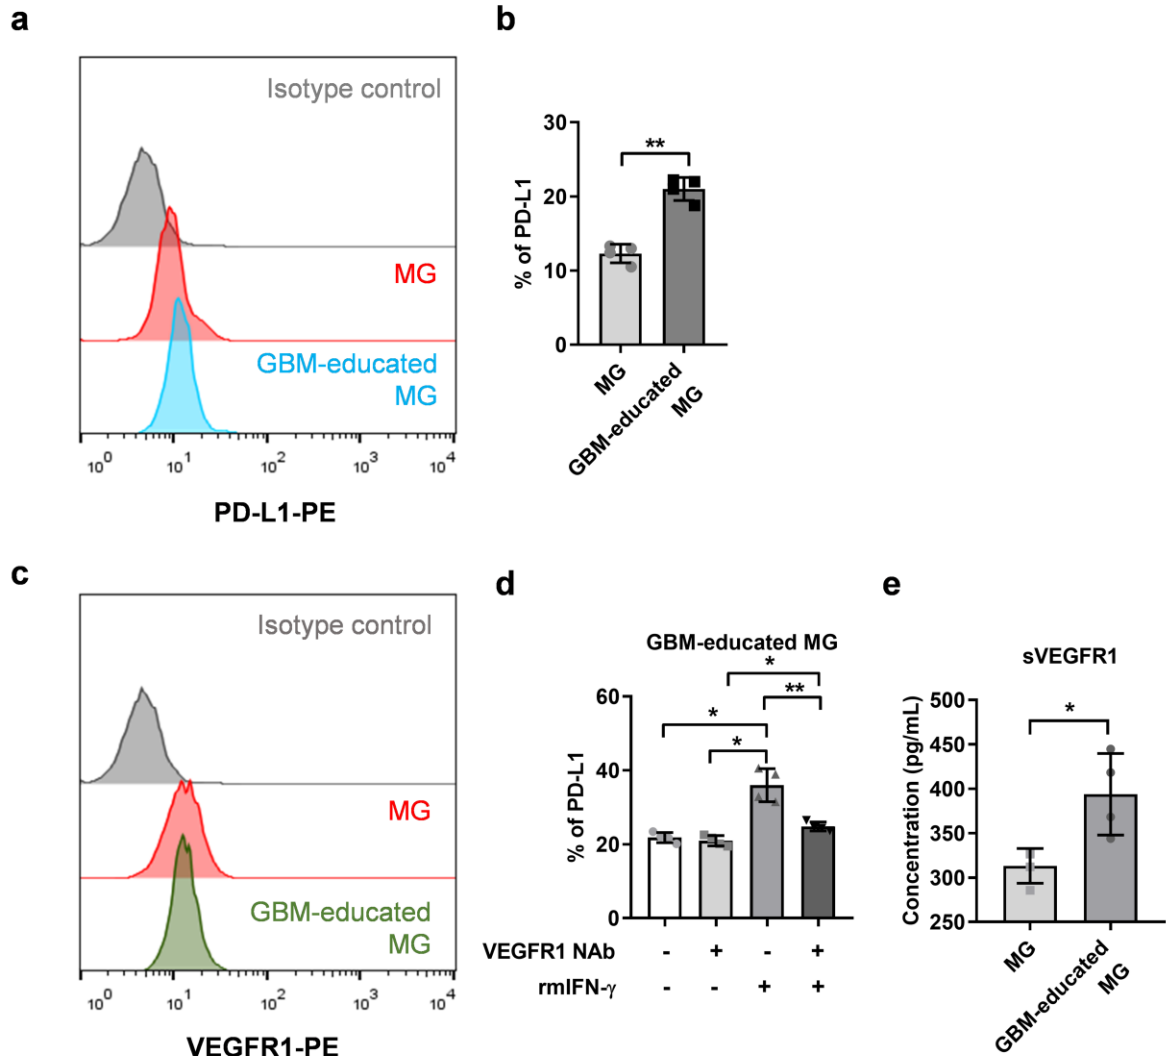

**Supplemental Figure 2. The effects of IFN- $\gamma$  and VEGFR on PD-L1 expression on GBM-educated microglia.** a. Typical flow-cytometry results of PD-L1 surface expression on BV-2 cells or GL261-educated BV-2 cells. b. Positive percentage of PD-L1 on the surface of BV-2 cells or GL261-educated BV-2 cells (n=4). \*\* P<0.01. c. Typical flow-cytometry results of VEGFR1 surface expression on BV-2 cells or GL261-educated BV-2 cells (n=4). d. PD-L1 positive percentage on GL261-educated BV-2 cells (n=4), treated with VEGFR1 NAb and/or rmIFN- $\gamma$ . \* P<0.05, \*\* P<0.01. e. sVEGFR1 levels in the supernatant of  $\Delta$ MFI values of BV-2 cells and GL261-educated BV-2 cells (n=4). \* P<0.05. P values are achieved by t-test. MG, BV-2 cells; GBM-educated MG, GL261-educated BV-2 cells.

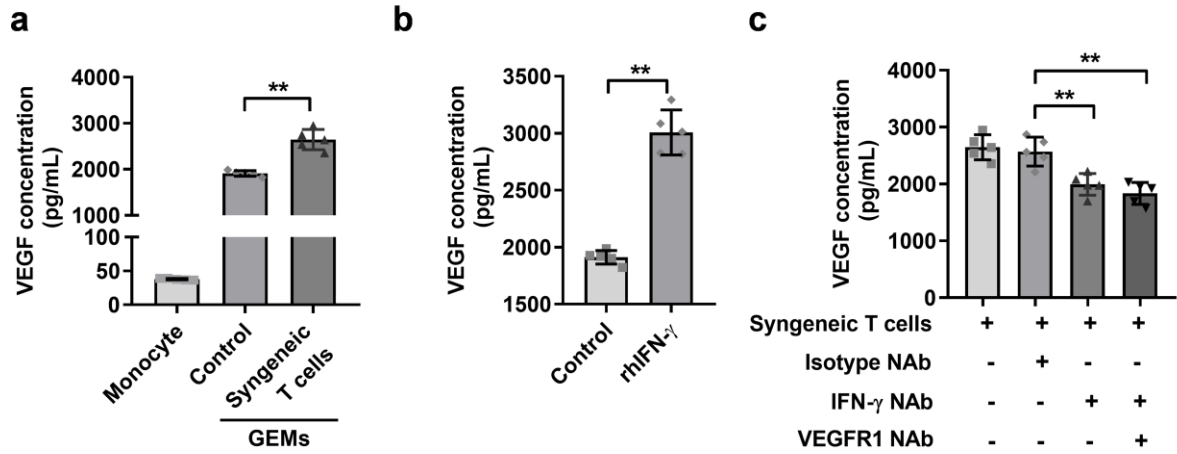

**Supplemental Figure 3. The regulation of IFN- $\gamma$  and VEGFR on VEGF production of GBM-educated macrophages.** a. VEGF concentration in the conditioned medium of circulating monocytes, GBM-educated macrophages and macrophages co-cultured with syngeneic T cells (n=5). \*\* P<0.01. b. VEGF concentration in the conditioned medium of GBM-educated macrophages with or without rhIFN- $\gamma$  (n=5). \* P<0.05. c. VEGF concentration in the conditioned medium of GBM-educated macrophages co-cultured with syngeneic T cells, and treated with VEGFR1 NAb and/or IFN- $\gamma$  NAb (n=5). \* P<0.05. P values are achieved by t-test. GEMs, GBM-educated macrophages.
